# Supplementary material for: EEG microstate transition cost correlates with task demands
Source: PubMed Central journal article supplement (PMC11495555; doi:10.1371/journal.pcbi.1012521), 2024-10-10

**S1 Fig. Selection of the best number of microstates using the cross-validation criterion.** (left) Fraction of total variance (GEV) explained by the microstates. (center) Residual noise. (right) Cross-validation (CV) as a function of the number of microstates (N states).

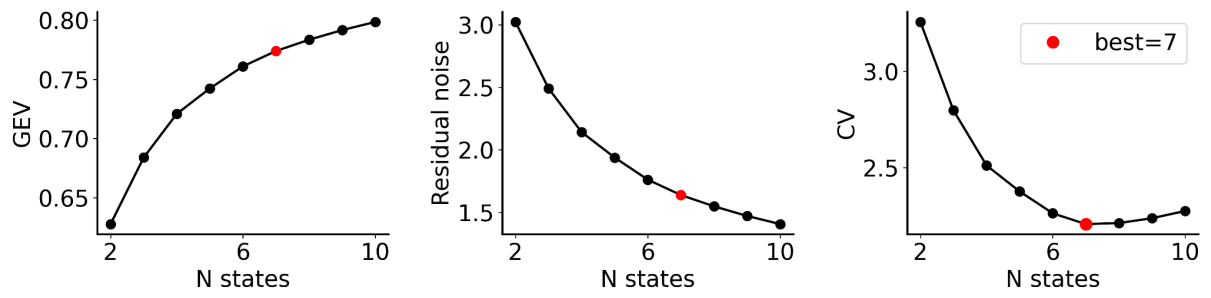

Supplement: pcbi.1012521.s001.pdf [file pcbi.1012521.s001.pdf]
