# Supplementary material for: EEG microstate transition cost correlates with task demands
Source: PubMed Central journal article supplement (PMC11495555; doi:10.1371/journal.pcbi.1012521), 2024-10-10

**S2 Fig. Behavioural results of the spatial Stroop task.**

Distribution of reaction times (RT) for the 44 participants during each task condition.

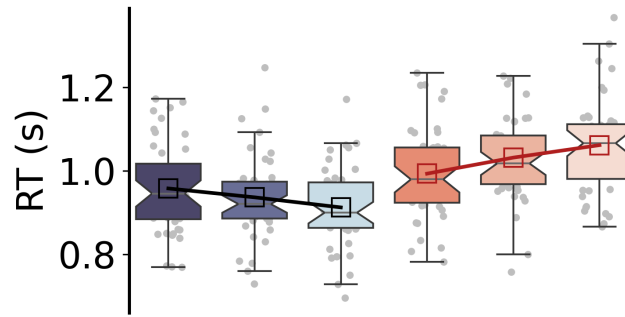

Supplement: pcbi.1012521.s002.pdf [file pcbi.1012521.s002.pdf]
