# Supplementary material for: EEG microstate transition cost correlates with task demands
Source: PubMed Central journal article supplement (PMC11495555; doi:10.1371/journal.pcbi.1012521), 2024-10-10

**S3 Fig. Global modulation of microstate distributions during the spatial Stroop task.**

Distribution of Kullback-Leibler divergence ( $D_{KL}$ ) between the task ( $\pi_{task}$ ) and resting ( $\pi_{rest}$ ) for the 44 participants.

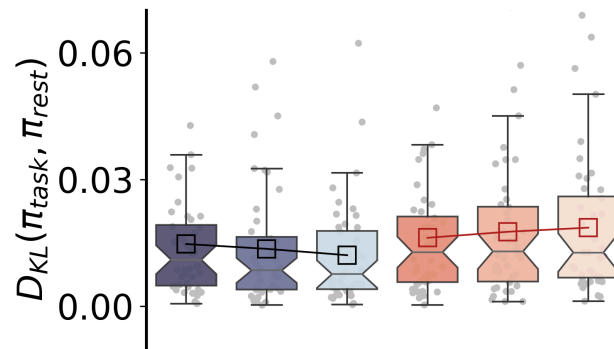

Supplement: pcbi.1012521.s003.pdf [file pcbi.1012521.s003.pdf]
