# Supplementary material for: EEG microstate transition cost correlates with task demands
Source: PubMed Central journal article supplement (PMC11495555; doi:10.1371/journal.pcbi.1012521), 2024-10-10
Supplement: pcbi.1012521.s005.pdf [file pcbi.1012521.s005.pdf]

### S1 Text. Modified k-means clustering.

The modified k-means algorithm, introduced in [1], involves the traditional k-means clustering approach. However, it incorporates polarity-invariant topographical maps of the prototype microstates and considers the activation levels of these microstates, specifically their strength at each time point. In mathematical terms, each instantaneous activity map  $x_t$  is assigned to the microstate index that

minimizes the orthogonal squared Euclidean distance,  $k_t = \operatorname{argmin}_k d_{kt}^2$ , where  $d_{kt}^2 = x_t^T x_t - (x_t^T a_k)^2$ . It turns out to be equivalent to maximizing the spatial correlation.

To define the best number of clusters, we employ the cross-validation criterion, which minimizes

$CV = \sigma^2 \left( \frac{n_{ch}-1}{n_{ch}-K-1} \right)^2$ , where  $\sigma^2 = \frac{\sum_t x_t^T x_t - (x_t^T a_t)^2}{T(n_{ch}-1)}$  is an estimator of the variance of the residual noise.

### References

1. Pascual-Marqui, R. D., Michel, C. M., & Lehmann, D. (1995). Segmentation of brain electrical activity into microstates: model estimation and validation. *IEEE Transactions on Biomedical Engineering*, 42(7), 658-665.
